# Supplementary material for: A novel microbial synthesis of catalytically active Ag–alginate biohydrogel and its antimicrobial activity
Source: Royal Society of Chemistry journal article supplement (doi:10.1039/c3dt51093j), 2013-01-01
Supplement: c3dt51093j.pdf [file c3dt51093j.pdf]

## **The novel microbial synthesis of catalytically active Ag-alginate biohydrogel and its antimicrobial activity**

**S. V. Otari<sup>a</sup>, R. M. Patil<sup>a</sup>, S. R. Waghmare<sup>b</sup>, S. J. Ghosh<sup>a</sup> and S. H. Pawar<sup>a\*</sup>**

<sup>a</sup> **Center for Interdisciplinary Research, D. Y. Patil University, Kolhapur-416 006,  
Maharashtra State, India.**

<sup>b</sup> **Department of Microbiology, Shivaji University, Kolhapur-416 004,  
Maharashtra State, India.**

### **Corresponding Author:**

Phone: +91-0231-260122

Fax: +91-231-2601595

Email: pawar\_s\_h@yahoo.com

## Result and Discussion

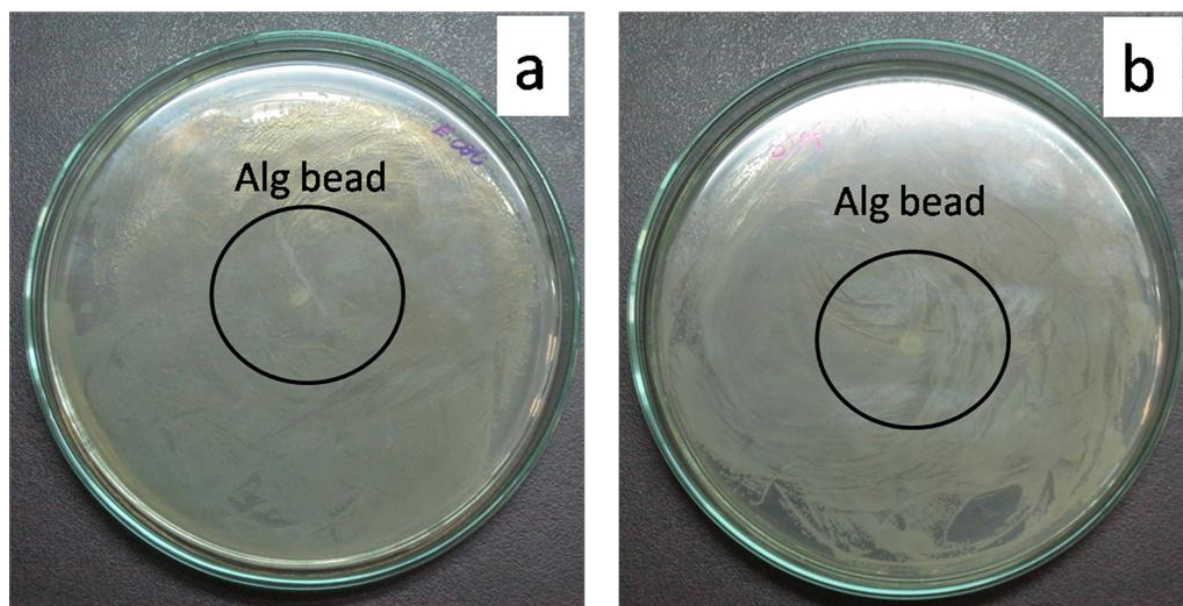

**Fig. S1** Effect of Alginate beads on (a) *Staphylococcus aureus*, (b) *E. Coli*
